# Supplementary material
Source: PubMed Central journal article supplement (PMC3988683)
Supplement: cm404168a_si_001.pdf [file cm404168a_si_001.pdf]

## Supporting Information

### Iron-loaded magnetic nanocapsules for pH-triggered drug release and dual MRI imaging

Hongyu Chen,<sup>a‡</sup> Dino Sulejmanovic,<sup>a‡</sup> Thomas Moore,<sup>b</sup> Daniel C. Colvin,<sup>c</sup> Bin Qi,<sup>d</sup> O. Thompson Mefford,<sup>d</sup> John C. Gore,<sup>c</sup> Frank Alexis,<sup>b</sup> Shiou-Jyh Hwu<sup>a</sup> and Jeffrey N. Anker<sup>a\*</sup>

<sup>a</sup> Department of Chemistry, Center for optical materials science and engineering (COMSET), and environmental toxicology program; Clemson University, Clemson, SC, 29634, USA. Tel:+1-864-656-1726. E-mail: janker@clemson.edu

<sup>b</sup> Department of Bioengineering, Clemson University, Clemson, SC, 29634, USA

<sup>c</sup> Vanderbilt University Medical Center, Vanderbilt University, Nashville, TN 37232, USA

<sup>d</sup> Department of Materials Science and Engineering and Center for optical materials science and engineering (COMSET), Clemson University, Clemson, SC, 29634, USA

\* Corresponding author. Email: [janker@clemson.edu](mailto:janker@clemson.edu)

#### Table of contents:

|                                                                                                                                                                                                                                                           |        |
|-----------------------------------------------------------------------------------------------------------------------------------------------------------------------------------------------------------------------------------------------------------|--------|
| <b>Figure S1.</b> SEM images of iron particle aggregation without silica coating.                                                                                                                                                                         | Page 2 |
| <b>Figure S2.</b> Size distribution of PLL/AL coated Fe@SiO <sub>2</sub> .                                                                                                                                                                                | Page 3 |
| <b>Figure S3.</b> Pore size distribution curve obtained from the Barret–Joner–Halenda (BJH) method.                                                                                                                                                       | Page 4 |
| <b>Figure S4.</b> (A) Fluorescent image of (Fe/DOX/Gd-DTPA)@SiO <sub>2</sub> @AL/PLL nanocapsules in solution. (B) Dynamic light scattering measurement of (Fe/DOX/Gd-DTPA)@SiO <sub>2</sub> @AL/PLL nanocapsules (average hydrodynamic diameter 453 nm). | Page 5 |
| <b>Figure S5.</b> TEM image of (Fe/DOX/Gd-DTPA)@SiO <sub>2</sub> @AL/PLL nanocapsules with a solid iron core (no hollow cavity).                                                                                                                          | Page 6 |
| <b>Figure S6.</b> pH-dependent release profile of Gd-DTPA from (Fe/DOX/Gd-DTPA)@SiO <sub>2</sub> @AL/PLL nanocapsules.                                                                                                                                    | Page 6 |

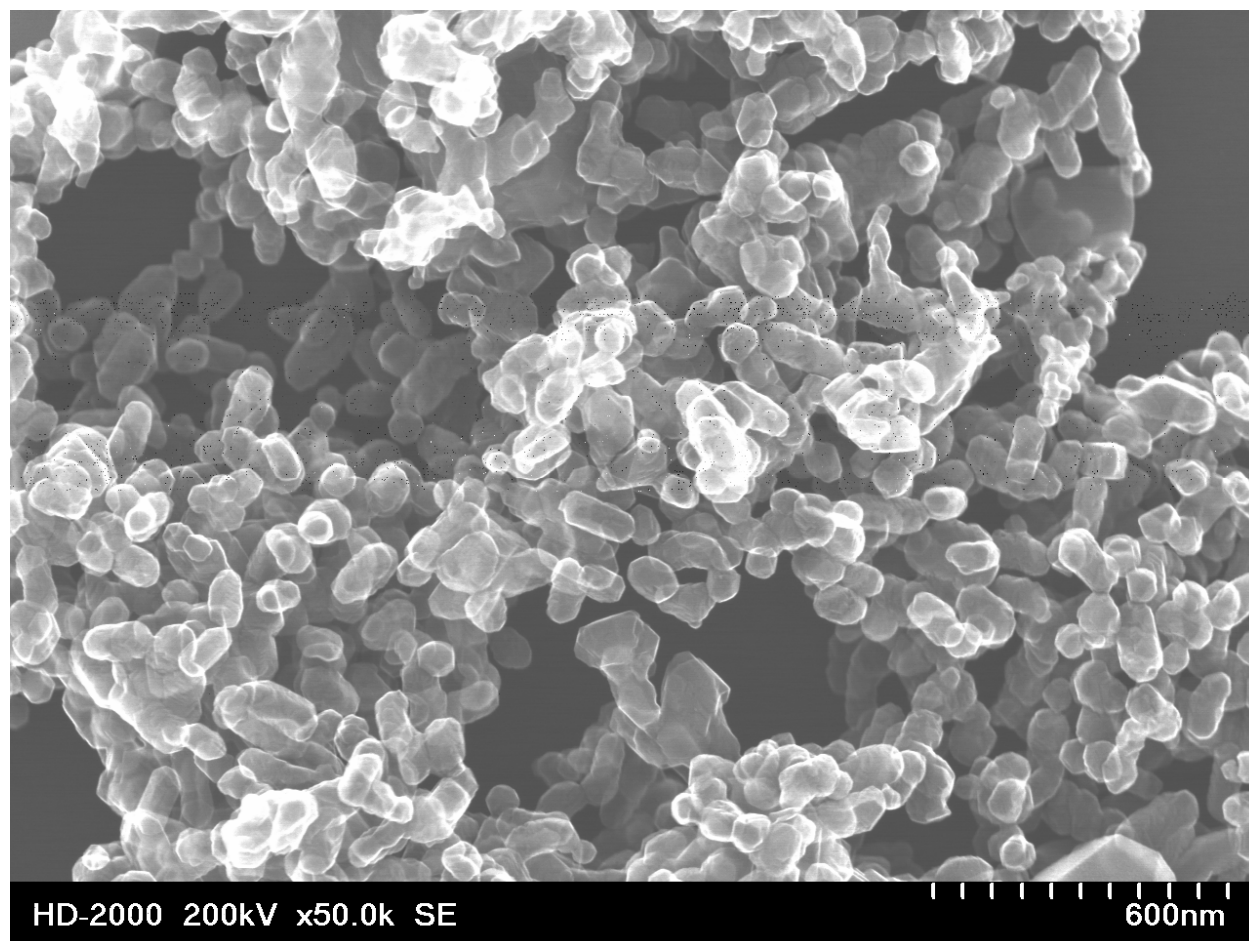

**Figure S1.** SEM images of iron particle aggregation in the absence of silica coating.

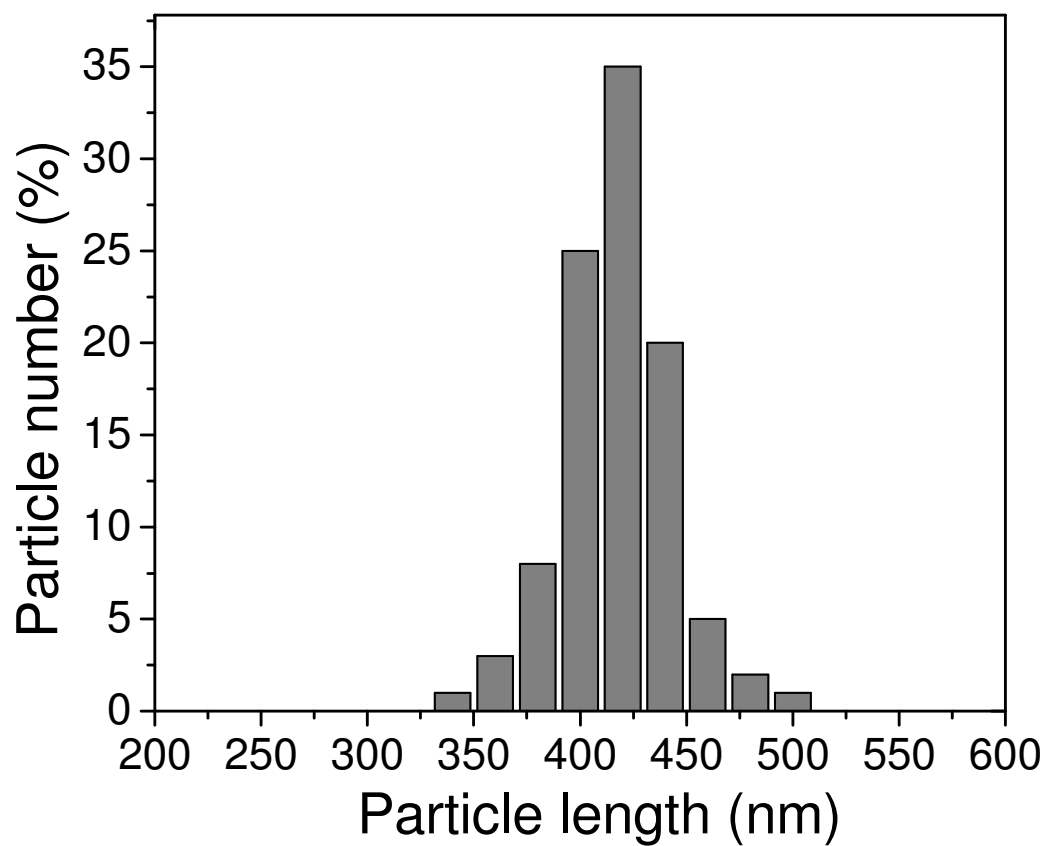

**Figure S2.** Size distribution histogram for PLL/AL-coated Fe@SiO<sub>2</sub>.

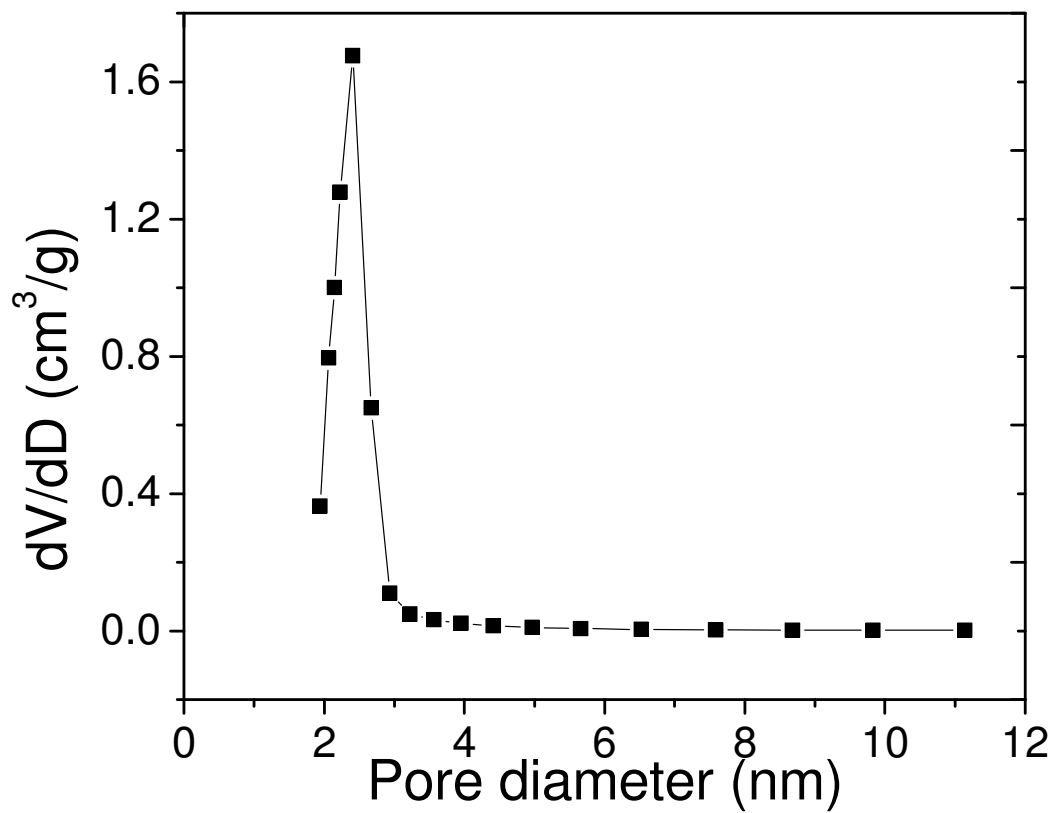

**Figure S3.** Pore size distribution curve obtained using the Barret–Joner–Halenda (BJH) method.

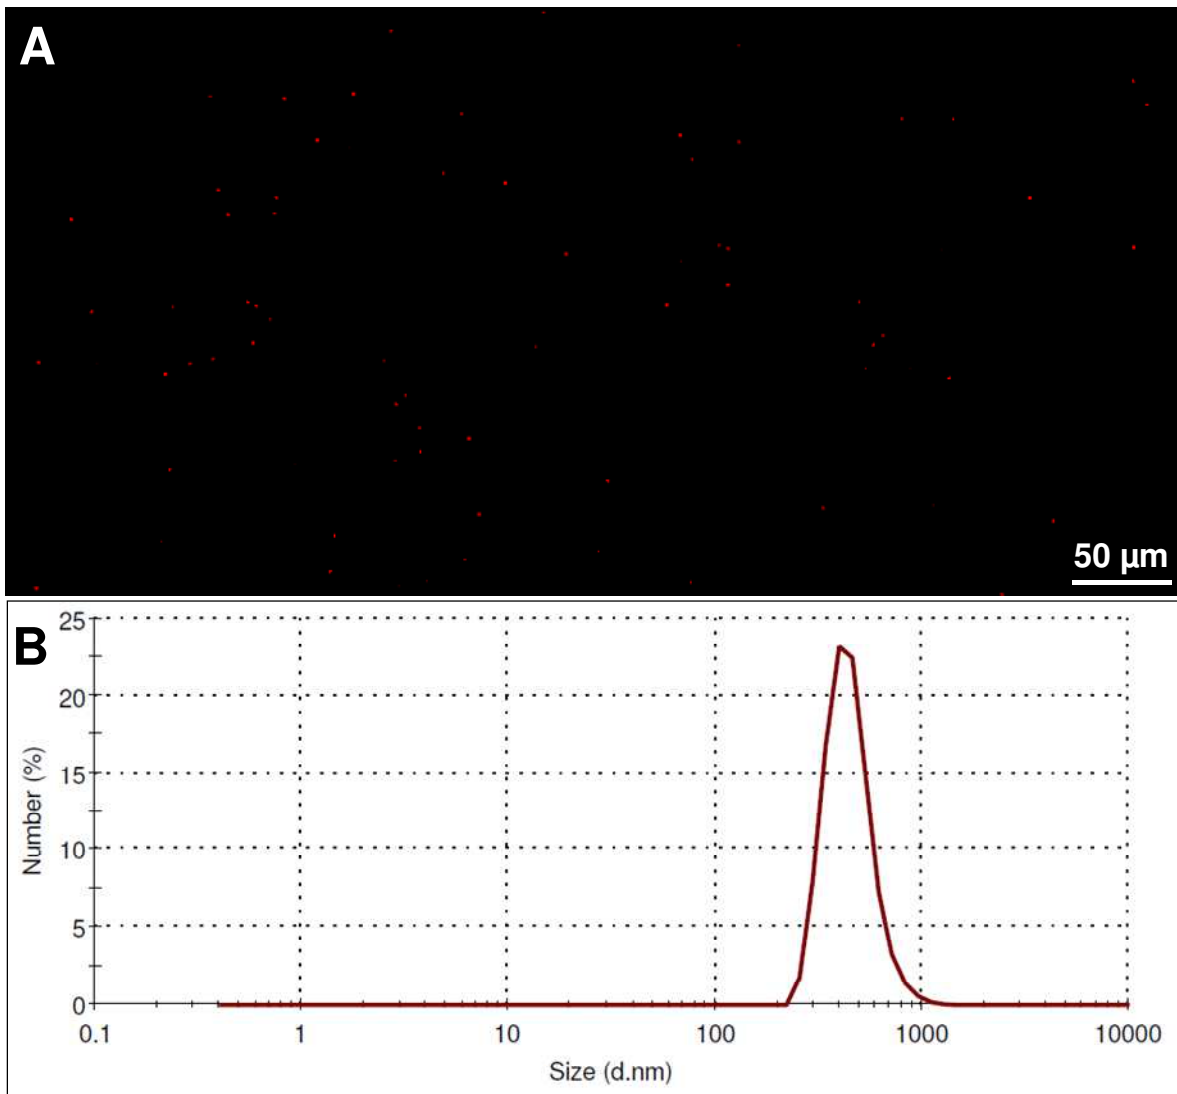

**Figure S4.** (A) Fluorescent image of (Fe/DOX/Gd-DTPA) $@\text{SiO}_2@\text{AL}/\text{PLL}$  nanocapsules in solution. (B) Dynamic light scattering measurement of (Fe/DOX/Gd-DTPA) $@\text{SiO}_2@\text{AL}/\text{PLL}$  nanocapsules (average hydrodynamic diameter 453 nm).

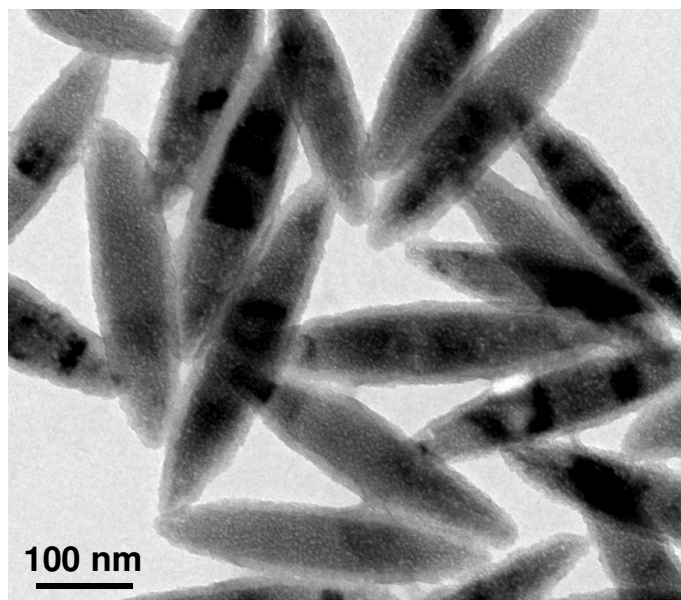

**Figure S5.** TEM image of (Fe/DOX/Gd-DTPA)@SiO<sub>2</sub>@AL/PLL nanocapsules with a solid iron core (no hollow cavity).

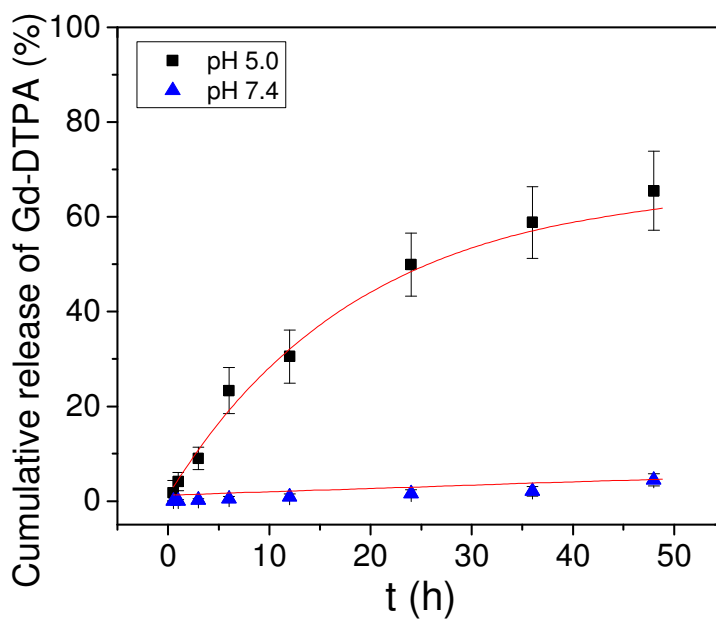

**Figure S6.** pH-dependent release profile of Gd-DTPA from (Fe/DOX/Gd-DTPA)@SiO<sub>2</sub>@AL/PLL nanocapsules.
